# Supplementary material for: Distinct transcriptional regulatory modules underlie STAT3’s cell type-independent and cell type-specific functions
Source: PubMed Central journal article supplement — Nucleic Acids Res. 2013 Jan 7;41(4):2155–70. doi: 10.1093/nar/gks1300 (PMC3575808; doi:10.1093/nar/gks1300), 2013-01-07
Supplement: supp_gks1300_nar-02659-x-2012-File010.pdf [file supp_gks1300_nar-02659-x-2012-File010.pdf]

**Supplementary Table 1. Detailed parameters and statistics for the ChIP-seq libraries used in this study.**

| ChIP-seq library | Cell-type           | Cytokines         | Publication           | Total number of sequence tags | That map to mm9 | %     | Multi-mapping reads (rejected) | %     | mfold-value used | p-value  | Number of peaks discovered | Estimated false positives | Estimated false positives % |
|------------------|---------------------|-------------------|-----------------------|-------------------------------|-----------------|-------|--------------------------------|-------|------------------|----------|----------------------------|---------------------------|-----------------------------|
| STAT3            | AfT-20 cells        | LIF               | Langlais et al., 2012 | 29,105,977                    | 18,969,201      | 65.2% | 8,844,683                      | 30.4% | 11,35            | 3.50E-06 | 7983                       | 88                        | 1.1%                        |
| IgG              | AfT-20 cells<br>PEC | LIF               | Langlais et al., 2012 | 59,664,040                    | 39,680,747      | 66.5% | 17,927,704                     | 30.0% | n.a.             | n.a.     | n.a.                       | n.a.                      | n.a.                        |
| STAT3            | macrophages<br>PEC  | IL-10             | Hutchins et al., 2012 | 5,099,637                     | 4,028,627       | 79.0% | 889,834                        | 17.4% | 16,35            | 1.00E-05 | 1724                       | 1                         | 0.1%                        |
| Input            | macrophages         | IL-10             | Hutchins et al., 2012 | 4,832,537                     | 3,662,036       | 75.8% | 819,062                        | 16.9% | n.a.             | n.a.     | n.a.                       | n.a.                      | n.a.                        |
| STAT3            | CD4+ T cells        | IL-21             | Kwon et al., 2009     | 108,581,819                   | 21,535,991      | 19.8% | 12,405,640                     | 11.4% | 11,35            | 1.00E-06 | 5152                       | 43                        | 0.8%                        |
| Input            | CD4+ T cells        | IL-21             | Kwon et al., 2009     | 76,954,817                    | 15,237,894      | 19.8% | 8,898,981                      | 11.6% | n.a.             | n.a.     | n.a.                       | n.a.                      | n.a.                        |
| STAT3            | ES cells            | LIF               | Chen et al., 2008     | 21,995,262                    | 8,815,612       | 40.1% | 5,585,494                      | 25.4% | 11,35            | 1.90E-07 | 2651                       | 40                        | 1.5%                        |
| GFP              | ES cells            | LIF               | Chen et al., 2008     | 23,873,274                    | 6,972,375       | 29.2% | 4,168,346                      | 17.5% | n.a.             | n.a.     | n.a.                       | n.a.                      | n.a.                        |
| c-MYC            | ES cells            | LIF               | Chen et al., 2008     | 26,967,738                    | 10,726,464      | 39.8% | 6,067,557                      | 22.5% | 13,35            | 7.00E-07 | 3917                       | 63                        | 1.6%                        |
| n-MYC            | ES cells            | LIF               | Chen et al., 2008     | 23,180,904                    | 7,727,705       | 33.3% | 4,107,895                      | 17.7% | 17,35            | 3.00E-06 | 11448                      | 121                       | 1.1%                        |
| CTCF             | ES cells            | LIF               | Chen et al., 2008     | 24,300,222                    | 3,440,101       | 14.2% | 1,653,496                      | 6.8%  | 32,50            | 1.00E-05 | 46934                      | 39                        | 0.1%                        |
| E2F1             | ES cells            | LIF               | Chen et al., 2008     | 30,489,540                    | 10,400,631      | 34.1% | 5,236,397                      | 17.2% | 21,40            | 3.50E-06 | 22523                      | 334                       | 1.5%                        |
| ESRRB            | ES cells            | LIF               | Chen et al., 2008     | 25,879,154                    | 11,852,759      | 45.8% | 4,840,122                      | 18.7% | 32,50            | 7.00E-06 | 56136                      | 675                       | 1.2%                        |
| KLF4             | ES cells            | LIF               | Chen et al., 2008     | 22,126,359                    | 6,703,974       | 30.3% | 3,414,979                      | 15.4% | 19,35            | 1.00E-05 | 25734                      | 105                       | 0.4%                        |
| NANOG            | ES cells            | LIF               | Chen et al., 2008     | 28,202,400                    | 3,068,511       | 10.9% | 1,920,771                      | 6.8%  | 16,35            | 1.00E-05 | 10594                      | 14                        | 0.1%                        |
| OCT4             | ES cells            | LIF               | Chen et al., 2008     | 24,021,520                    | 8,071,104       | 33.6% | 4,417,321                      | 18.4% | 12,35            | 1.70E-06 | 5611                       | 74                        | 1.3%                        |
| SOX2             | ES cells            | LIF               | Chen et al., 2008     | 23,073,668                    | 8,290,455       | 35.9% | 4,197,831                      | 18.2% | 13,35            | 9.00E-07 | 5912                       | 68                        | 1.2%                        |
| ZFX              | ES cells            | LIF               | Chen et al., 2008     | 17,968,940                    | 7,419,724       | 41.3% | 3,681,413                      | 20.5% | 23,40            | 1.00E-05 | 31637                      | 173                       | 0.5%                        |
| GATA3            | Th17 cells          | TGFb, IL-6, IL-1b | Wei et al., 2011      | 7,226,595                     | 4,040,050       | 55.9% | 2,443,773                      | 33.8% | 23,40            | 1.00E-05 | 2512                       | 31                        | 1.2%                        |
| Junb             | Th17 cells          | TGFb, IL-6, IL-1b |                       |                               |                 |       |                                |       |                  |          |                            |                           |                             |
| GATA3            | naive CD4+          | None              | Wei et al., 2011      | 9,147,587                     | 4,264,960       | 46.6% | 2,614,970                      | 28.6% | 23,40            | 1.00E-05 | 4685                       | 42                        | 0.9%                        |

|        |              |       |                      |            |            |       |           |       |       |          |       |     |      |
|--------|--------------|-------|----------------------|------------|------------|-------|-----------|-------|-------|----------|-------|-----|------|
| GATA3  | Th2 cells    | ?     | Wei et al.,<br>2011  | 9,675,003  | 6,057,673  | 62.6% | 3,329,879 | 34.4% | 23,40 | 1.00E-09 | 5693  | 90  | 1.6% |
| IRF4   | CD4+ T cells | IL-21 | Kwon et al.,<br>2009 | 44,641,032 | 11,775,280 | 26.4% | 6,146,666 | 13.8% | 23,40 | 1.00E-08 | 19708 | 188 | 1.0% |
| IRF4   | CD4+ T cells | None  | Kwon et al.,<br>2009 | 48,730,424 | 12,555,258 | 25.8% | 6,475,873 | 13.3% | 23,40 | 2.00E-07 | 22298 | 222 | 1.0% |
| panJUN | CD4+ T cells | IL-21 | Li et al., 2012      |            |            |       |           |       |       | 1.00E-09 | 2822  | 156 | 5.5% |
| panJUN | CD4+ T cells | None  | Li et al., 2012      |            |            |       |           |       |       | n.p.     |       |     |      |
| BATF   | CD4+ T cells | IL-21 | Li et al., 2012      |            |            |       |           |       |       | 1.00E-08 | 5171  | 105 | 2.0% |

**Supplementary Table 2. List of primers used in this study.**

| Name          | Genomic location (mm9)    | Forward               | Reverse              |
|---------------|---------------------------|-----------------------|----------------------|
| Stat3         | chr11:100800982-100801167 | CTCCCTGAGTTGGCTGTTCT  | GAGCCGTATCAGGGCATTTA |
| Socs3         | chr11:117830790-117830997 | CCCCCAACTTCTCATTACACA | TACATGAGGACCTCGGAGTG |
| Tcf4          | chr18:69503838-69504238   | CACACTGACAGGGACACTGC  | GTGGGACTCACTCAGGTCGT |
| Ptpn1         | chr2:167750629-167751029  | ATGCTTCTCTGCAGCCTTTC  | CCTCACTGGGCTCTTGAAAC |
| Junb          | chr8:87500268-87500668    | ATATGGGCAGAGCTTCCGTA  | CAGTACAAACGCCCAGACCT |
| Cmtm6         | chr9:114640156-114640556  | CCGAGAGTTTTAGCTGGGTGA | AGCTGCAAGCCTTTGAGGAT |
| Diap1         | chr18:38039780-38040180   | ACAGGCAGCCTTGCTTAAAA  | CAAGGCCGGAATAAAACAGA |
| Eif1a         | chr18:46757183-46757583   | TACTCCCCGGTGGTAGAGAG  | CAGAGGGCTTTAGCATCCAG |
| Foxk1         | chr5:142843084-142843484  | ACAACGTCCTCAAGGCTCAT  | GGAAGGGGCACTAGTCAGGA |
| Nfkbiz        | chr16:55822180-55822580   | GCTGCTGCAAGAACAGGTC   | GAAATTGAGTCCAGGCCAGA |
| Pih1d1        | chr7:52409473-52409873    | GCGAGAGGTATGGGGATTTA  | CGTGATTTCCCTACAGTGC  |
| Setmar        | chr6:108014985-108015385  | GCAGCATCTGAGGAGGAATC  | CAGCCCTTTCAGCCACTTAG |
| Skap2         | chr6:51962503-51962903    | GAGCGAATTGGAGCTGTGTC  | AACCTTGGTGGAAAAGACCA |
| Smardc2       | chr11:106134199-106134599 | ACCAGCACCTCCCATAACTG  | TTGAAGACGCAGAATTGACG |
| Control       | chr19:34317846-34317997   | CTTCTGCATCCTGTCAGCAA  | CTTTTCCAGGGATGGAGTCA |
| Fas (control) | chr19:34328661+34328879   | TGAAAGGAGCGTTGTCAGT   | ATTTTTGGCACCAGATGAGC |

**Supplementary Table 5. Summary of the genes regulated by STAT3 in all four cell types.**

| Gene Symbol   | Annotation         | Notes                                                                                                                                                                                                                                                                                                                                                                                                                                                                                                                                                                                                                                                                                                                                                                                                                          | Function                              |
|---------------|--------------------|--------------------------------------------------------------------------------------------------------------------------------------------------------------------------------------------------------------------------------------------------------------------------------------------------------------------------------------------------------------------------------------------------------------------------------------------------------------------------------------------------------------------------------------------------------------------------------------------------------------------------------------------------------------------------------------------------------------------------------------------------------------------------------------------------------------------------------|---------------------------------------|
| 1810013L24Rik | NM_001081400       | Unknown                                                                                                                                                                                                                                                                                                                                                                                                                                                                                                                                                                                                                                                                                                                                                                                                                        | Unknown                               |
| Aars          | NM_146217          | alanyl-tRNA synthetase is important for protein translation (1)                                                                                                                                                                                                                                                                                                                                                                                                                                                                                                                                                                                                                                                                                                                                                                | Protein translation                   |
| Amn1          | NM_001113424       | In yeast, Failure of Amn1 function results in defects of both the spindle assembly and nuclear orientation checkpoints and delays turning off Cdc14 in G1. Thus, Amn1 is part of a daughter-specific switch that helps cells exit from mitotic exit and reset the cell cycle. Co activator of ste12 (control stat1-like transcription)                                                                                                                                                                                                                                                                                                                                                                                                                                                                                         | Cell cycle control                    |
| Azin1         | ENSMUSG00000037458 | Ornithine decarboxylase (ODC) catalyzes the conversion of ornithine to putrescine in the first and apparently rate-limiting step in polyamine biosynthesis. Ornithine decarboxylase antizymes play a role in the regulation of polyamine synthesis by binding to and inhibiting ornithine decarboxylase. The protein encoded by this gene is highly similar to ODC. It binds to ODC antizyme and stabilizes ODC, thus inhibiting antizyme-mediated ODC degradation (2).                                                                                                                                                                                                                                                                                                                                                        | Metabolism and cell growth            |
| Bcl3          | NM_033601          | B cell leukemia/lymphoma 3. This protein is an atypical member of the Inhibitor of Kappa-B (IkappaB) family of proteins. It is believed to repress the activation of the NFkappa-B signaling cascade by direct binding to the dimeric transcription factors NFKB1, NFKB2, RELA, RELB or c-Rel (3).                                                                                                                                                                                                                                                                                                                                                                                                                                                                                                                             | Transcription factor (proto-oncogene) |
| Bcl6          | NM_009744          | B cell leukemia/lymphoma 6. Bcl6 prevents premature activation and differentiation of germinal center B cells and provides an environment tolerant of the DNA breaks associated with immunoglobulin gene remodeling mechanisms involved in the production of high-affinity antibodies of different isotypes. Acts as an oncogene when overexpressed (4).                                                                                                                                                                                                                                                                                                                                                                                                                                                                       | Transcription factor (oncogene)       |
| Cic           | NM_027882          | Also known as capicua, Transcriptional repressor, generally a negative repressor of receptor kinase. Inactivated by tor kinase downstream of PI3K (5)                                                                                                                                                                                                                                                                                                                                                                                                                                                                                                                                                                                                                                                                          | Transcription factor                  |
| Cmtm6         | NM_026036          | Also known in mouse as CKLF-like MARVEL transmembrane domain containing 6 chemokine-like factor superfamily.                                                                                                                                                                                                                                                                                                                                                                                                                                                                                                                                                                                                                                                                                                                   | Cytokine regulator                    |
| Diap1         | ENSMUSG00000024456 | Also known as p140mDia, p140mDia, is a downstream effector of Rho. It is a mammalian homolog of Drosophila diaphanous, a protein required for cytokinesis, and belongs to a family of formin-related proteins containing repetitive polyproline stretches. p140mDia binds selectively to the GTP-bound form of Rho and also binds to profilin. p140mDia, profilin and RhoA are co-localized in the spreading lamellae of cultured fibroblasts. They are also co-localized in membrane ruffles of phorbol ester-stimulated sMDCK2 cells, which extend these structures in a Rho-dependent manner. The three proteins are recruited around phagocytic cups induced by fibronectin-coated beads. It suggest that Rho regulates actin polymerization by targeting profilin via p140mDia beneath the specific plasma membranes. (6) | Cytoskeleton and trafficking          |
| Eif1a         | NM_010120          | Eukaryotic initiation factor 1 assists in targeting the ribosome to the AUG start codon (7).                                                                                                                                                                                                                                                                                                                                                                                                                                                                                                                                                                                                                                                                                                                                   | Protein translation                   |
| Fos           | NM_010234          | Transcription factor, member of AP-1 transcriptional complex. Wide roles in biology.                                                                                                                                                                                                                                                                                                                                                                                                                                                                                                                                                                                                                                                                                                                                           | Transcription factor                  |
| Foxk1         | ENSMUSG00000075577 | Transcriptional co-repressor.                                                                                                                                                                                                                                                                                                                                                                                                                                                                                                                                                                                                                                                                                                                                                                                                  | Transcription factor (repressor)      |
| Irf2          | NM_008391          | Transcriptional co-repressor.                                                                                                                                                                                                                                                                                                                                                                                                                                                                                                                                                                                                                                                                                                                                                                                                  | Transcription factor (repressor)      |

|         |                                     |                                                                                                                                                                                                                                                                                                                         |                                     |
|---------|-------------------------------------|-------------------------------------------------------------------------------------------------------------------------------------------------------------------------------------------------------------------------------------------------------------------------------------------------------------------------|-------------------------------------|
| Junb    | NM_008416                           | Transcription factor, member of the AP-1 transcriptional complex.                                                                                                                                                                                                                                                       | Transcription factor                |
| Mnt     | NM_010813                           | <i>Mus musculus</i> max binding protein (Mnt) repress Myc activity by binding to Max (8).                                                                                                                                                                                                                               | Transcription factor (repressor)    |
| Mrpl52  | NM_026851                           | Mitochondrial ribosomal protein L52 (Mrpl52), potentially important in ribosomal synthesis.                                                                                                                                                                                                                             | Metabolism and cell growth          |
| Neat1   | NR_003513<br>ENSMUSG000<br>00092274 | Architectural long noncoding RNA NEAT1 (Mene/β) present in paraspeckles, subnuclear bodies that alter gene expression via the nuclear retention of RNA (9).                                                                                                                                                             | Transcription factor                |
| Nfkbiz  | NM_001159395                        | Also known as I-kappa-B-zeta. It is an important regulator of NFKB in immune cells by binding to it as a co-transcription factor (10).                                                                                                                                                                                  | Transcription factor                |
| Pih1d1  | NM_029406                           | Regulator of the anti-apoptotic protein PIH1D1 (chaperone like protein), a subunit of R2TP complex, it is an anti apoptotic protein and also contributes to the assembly of the RNA pol II complex. Involved in cell growth (11).                                                                                       | Metabolism and cell growth          |
| Ptpn1   | NM_011201                           | A protein tyrosine phosphatase, PTP1B (encoded by Ptpn1) is involved in modulating signaling from many tyrosine kinases and in particular JAK-STAT pathways through the tyrosine dephosphorylation of JAK2 and STAT3. It is a modulator of cell metabolism through its action on tyrosine phosphorylated proteins. (12) | Metabolism and cell growth          |
| Sbno1   | NM_001081203                        | Mouse ortholog of the strawberry notch homolog 1 in <i>Drosophila</i> (Sbno1). It was detected as a Notch pathway modulator in fly and a target of myc-jmjC transcription complex. It is a positive modulator of cell growth (13).                                                                                      | Transcription factor (repressor)    |
| Setmar  | NM_178391                           | SET domain and mariner transposase fusion gene (Setmar). Also known as Metnase, acts as an antiapoptosis protein by promoting non-homologous end joining (NHEJ) repair.                                                                                                                                                 | DNA repair and chromatin remodeling |
| Skap2   | NM_018773                           | Partner of PTP-PEST and involved in recognizing actin fibers. It is an integrin regulated gene involve in cell migration and cell adhesion. (14)                                                                                                                                                                        | Cytoskeleton and trafficking        |
| Smarcd2 | NM_031878                           | Also known as BAF60B. It is a member of the SWI/SNF related, matrix associated, actin dependent regulator of chromatin, subfamily d, member 2 (Smarcd2). Chromatin remodeling. (15)                                                                                                                                     | DNA repair and chromatin remodeling |
| Socs3   | NM_007707                           | Negative regulator of JAK-STAT. (16)                                                                                                                                                                                                                                                                                    | Cytokine regulator                  |
| Stat1   | NM_009283                           | Member of the STAT family of transcription factors.                                                                                                                                                                                                                                                                     | Transcription factor                |
| Stat3   | NM_213659                           | STAT3 binds to its own promoter to regulate its own transcription (17).                                                                                                                                                                                                                                                 | Transcription factor                |
| Tcf4    | NM_013685                           | Beta-catenin binding transcription factor (18).                                                                                                                                                                                                                                                                         | Transcription factor                |
| Tiparp  | NM_178892                           | TCDD-inducible poly(ADP-ribose) polymerase (Tiparp) (dioxin like inducible). Involved in the response to dioxin and potentially contributes to the immunomodulation of AHR (Aryl hydrocarbon receptor) as one of its target genes (19).                                                                                 | Metabolism and cell growth          |
| Tut1    | NM_197993                           | Transcription <i>Mus musculus</i> terminal uridylyl transferase 1, U6 snRNA-specific (Tut1), involved in miRNA processing (20).                                                                                                                                                                                         | RNA modulator                       |
| Vps28   | NM_025842                           | Acting on protein trafficking and recycling through the ESRT-1 complex.                                                                                                                                                                                                                                                 | Cytoskeleton and trafficking        |
| Zfp36   | NM_011756                           | Multiple names, primarily known as tristetraproline. A major negative regulator of IL-10 mRNA in activated macrophages, suppresses the anti-inflammatory response (21).                                                                                                                                                 | RNA modulator                       |
| Fam86   | NM_027446                           | AdoMet_MTases; S-adenosylmethionine-dependent methyltransferases (SAM or AdoMet-MTase), class I; AdoMet-MTases are enzymes that use S-adenosyl-L-methionine (SAM or AdoMet) as a                                                                                                                                        | Metabolism and cell growth          |

|          |                    |                                                                                                                                                                                         |                                                |
|----------|--------------------|-----------------------------------------------------------------------------------------------------------------------------------------------------------------------------------------|------------------------------------------------|
|          |                    | substrate for methyltransfer, creating the product S-adenosyl-L-homocysteine (AdoHcy). They are used to methylate a large number of biomolecules (protein to tRNA to nucleotides etc.). |                                                |
| Xrcc6bp1 | ENSMUSG00000025436 | Mitochondrial inner membrane protease ATP23 homolog. Associated with DNA repair gene KU70 also known as KUB3. Acts as an oncogene when overexpressed.                                   | DNA repair and chromatin Remodeling (oncogene) |
| Zfp217   | ENSMUSG00000052056 | Involved with Oct4 in embryonic stem cell maintenance (22).                                                                                                                             | Transcription factor                           |

|                                     |           |
|-------------------------------------|-----------|
| <b>Total genes</b>                  | <b>35</b> |
| Transcription factors               | 15        |
| DNA repair and chromatin remodeling | 3         |
| Metabolism and cell growth          | 6         |
| RNA modulator                       | 2         |
| Cytoskeleton and trafficking        | 3         |
| Cytokine regulator                  | 2         |
| Protein translation                 | 2         |
| Cell cycle control                  | 1         |
| Unknown                             | 1         |

## REFERENCES

1. Yadavalli, S.S. and Ibba, M. (2012) Quality control in aminoacyl-tRNA synthesis its role in translational fidelity. *Advances in protein chemistry and structural biology*, **86**, 1-43.
2. Perez-Leal, O. and Merali, S. (2012) Regulation of polyamine metabolism by translational control. *Amino acids*, **42**, 611-617.
3. Maldonado, V. and Melendez-Zajgla, J. (2011) Role of Bcl-3 in solid tumors. *Molecular cancer*, **10**, 152.
4. Basso, K. and Dalla-Favera, R. (2012) Roles of BCL6 in normal and transformed germinal center B cells. *Immunological reviews*, **247**, 172-183.
5. Jimenez, G., Shvartsman, S.Y. and Paroush, Z. (2012) The Capicua repressor - a general sensor of RTK signaling in development and disease. *Journal of cell science*, **125**, 1383-1391.
6. Watanabe, N., Madaule, P., Reid, T., Ishizaki, T., Watanabe, G., Kakizuka, A., Saito, Y., Nakao, K., Jockusch, B.M. and Narumiya, S. (1997) p140<sup>Diaph</sup>, a mammalian homolog of *Drosophila* diaphanous, is a target protein for Rho small GTPase and is a ligand for profilin. *The EMBO journal*, **16**, 3044-3056.
7. Hinnebusch, A.G. (2011) Molecular mechanism of scanning and start codon selection in eukaryotes. *Microbiology and molecular biology reviews : MMBR*, **75**, 434-467, first page of table of contents.

8. Walker, W., Zhou, Z.Q., Ota, S., Wynshaw-Boris, A. and Hurlin, P.J. (2005) Mnt-Max to Myc-Max complex switching regulates cell cycle entry. *The Journal of cell biology*, **169**, 405-413.
9. Passon, D.M., Lee, M., Rackham, O., Stanley, W.A., Sadowska, A., Filipovska, A., Fox, A.H. and Bond, C.S. (2012) Structure of the heterodimer of human NONO and paraspeckle protein component 1 and analysis of its role in subnuclear body formation. *Proceedings of the National Academy of Sciences of the United States of America*, **109**, 4846-4850.
10. Kannan, Y., Yu, J., Raices, R.M., Seshadri, S., Wei, M., Caligiuri, M.A. and Wewers, M.D. (2011) IkappaBzeta augments IL-12- and IL-18-mediated IFN-gamma production in human NK cells. *Blood*, **117**, 2855-2863.
11. Boulon, S., Bertrand, E. and Pradet-Balade, B. (2012) HSP90 and the R2TP co-chaperone complex: building multi-protein machineries essential for cell growth and gene expression. *RNA biology*, **9**, 148-154.
12. Lessard, L., Stuble, M. and Tremblay, M.L. (2010) The two faces of PTP1B in cancer. *Biochimica et biophysica acta*, **1804**, 613-619.
13. Takano, A., Zochi, R., Hibi, M., Terashima, T. and Katsuyama, Y. (2010) Expression of strawberry notch family genes during zebrafish embryogenesis. *Developmental dynamics : an official publication of the American Association of Anatomists*, **239**, 1789-1796.
14. Zhou, L., Zhang, Z., Zheng, Y., Zhu, Y., Wei, Z., Xu, H., Tang, Q., Kong, X. and Hu, L. (2011) SKAP2, a novel target of HSF4b, associates with NCK2/F-actin at membrane ruffles and regulates actin reorganization in lens cell. *Journal of cellular and molecular medicine*, **15**, 783-795.
15. Lores, P., Visvikis, O., Luna, R., Lemichez, E. and Gacon, G. (2010) The SWI/SNF protein BAF60b is ubiquitinated through a signalling process involving Rac GTPase and the RING finger protein Unkempt. *The FEBS journal*, **277**, 1453-1464.
16. Shuai, K. and Liu, B. (2003) Regulation of JAK-STAT signalling in the immune system. *Nature reviews. Immunology*, **3**, 900-911.
17. Hutchins, A.P., Poulain, S. and Miranda-Saavedra, D. (2012) Genome-wide analysis of STAT3 binding in vivo predicts effectors of the anti-inflammatory response in macrophages. *Blood*, **119**, e110-119.
18. Shitashige, M., Hirohashi, S. and Yamada, T. (2008) Wnt signaling inside the nucleus. *Cancer science*, **99**, 631-637.
19. Diani-Moore, S., Ram, P., Li, X., Mondal, P., Youn, D.Y., Sauve, A.A. and Rifkind, A.B. (2010) Identification of the aryl hydrocarbon receptor target gene TiPARP as a mediator of suppression of hepatic gluconeogenesis by 2,3,7,8-tetrachlorodibenzo-p-dioxin and of nicotinamide as a corrective agent for this effect. *The Journal of biological chemistry*, **285**, 38801-38810.
20. Wyman, S.K., Knouf, E.C., Parkin, R.K., Fritz, B.R., Lin, D.W., Dennis, L.M., Krouse, M.A., Webster, P.J. and Tewari, M. (2011) Post-transcriptional generation of miRNA variants by multiple nucleotidyl transferases contributes to miRNA transcriptome complexity. *Genome research*, **21**, 1450-1461.
21. Gaba, A., Grivennikov, S.I., Do, M.V., Stumpo, D.J., Blackshear, P.J. and Karin, M. (2012) Cutting Edge: IL-10-Mediated Tristetraprolin Induction Is Part of a Feedback Loop That Controls Macrophage STAT3 Activation and Cytokine Production. *J Immunol*.
22. Pardo, M., Lang, B., Yu, L., Prosser, H., Bradley, A., Babu, M.M. and Choudhary, J. (2010) An expanded Oct4 interaction network: implications for stem cell biology, development, and disease. *Cell stem cell*, **6**, 382-395.
